# Supplementary material for: Symptomatic Construct Failure after Metastatic Spine Tumor Surgery
Source: PubMed Central journal article supplement — Asian Spine J. 2020 Oct 29;15(4):481–90. doi: 10.31616/asj.2020.0166 (PMC8377214; doi:10.31616/asj.2020.0166), 2020-10-29
Supplement: asj-2020-0166-suppl2.pdf [file asj-2020-0166-suppl2.pdf]

**Supplemental Table 2.** Demographics, preoperative and operative characteristics of individual patients exhibiting symptomatic implant failure

| No.                                                             | Age (yr) | Sex | Primary tumor | SINS | ECOG preoperative | Metastasis site  | Type of lesion | Levels of instrumentation | Approach (posterior, anterior, combined) | Type of surgery (posterior, anterior, combined)                                                     | Type of failure/description                                                                                    | Onset and presentation of failure                | Revision after index surgery                                                          | Survival after surgery (mo) |
|-----------------------------------------------------------------|----------|-----|---------------|------|-------------------|------------------|----------------|---------------------------|------------------------------------------|-----------------------------------------------------------------------------------------------------|----------------------------------------------------------------------------------------------------------------|--------------------------------------------------|---------------------------------------------------------------------------------------|-----------------------------|
| <b>Implant failure/construct failure with revision surgery</b>  |          |     |               |      |                   |                  |                |                           |                                          |                                                                                                     |                                                                                                                |                                                  |                                                                                       |                             |
| 1                                                               | 49       | F   | Breast        | 8    | 2                 | C5–C6, T1, T2    | Lytic          | C3–T4                     | Open                                     | Posterior stabilization C3–T4; posterior decompression of T2; anterior cervical corpectomy of C5–C7 | T4 cord compression secondary to screw cut-out; translation and subsidence of cage; anterior plate disassembly | 4 months; neurological deficit; intractable pain | Repositioning of T4 screws; extension of instrumentation to T6                        | 41                          |
| 2                                                               | 62       | M   | Lung          | 9    | 1                 | T11              | Mixed          | T9–L3                     | MIS                                      | Posterior stabilization T9–L3; laminectomy and decompression at T11                                 | Screw pull-out                                                                                                 | 1 month; implant prominence; wound dehiscence    | Removal of both L3 and single L2 screws; shortening of instrumentation to L2          | 65                          |
| 3                                                               | 56       | M   | Lung          | 13   | 2                 | T12              | Lytic          | T11–L1                    | MIS                                      | Posterior stabilization T11–L1                                                                      | Increase in kyphosis by 20°; secondary to collapse of T12; screw ploughing                                     | 1 month; neurological deficit and back pain      | Anterior instrumentation T11–L1; anterior corpectomy of T12; reconstruction with cage | 28                          |
| 4                                                               | 54       | F   | Nasopharynx   | 10   | 3                 | T11–T12          | Lytic          | T10–L3                    | Open                                     | Posterior stabilization T10–L3; decompression T11–T12                                               | Fracture of T9 and T10 due to local disease progression; screw cut-out and pull-out in upper vertebra          | 6 months; neurological deficit; severe back pain | Extension of posterior instrumentation to T6–T8; decompression of T9 and T11          | 8.5                         |
| 5                                                               | 56       | M   | Kidney        | 9    | 2                 | L2               | Lytic          | T12–L4                    | Open                                     | Posterior stabilization T12–L4                                                                      | Reduced anterior column height; reduced lordosis                                                               | 10 months; neurological deficit                  | Anterior corpectomy and cage placement of L2                                          | 18                          |
| <b>Symptomatic failures that cannot be managed with surgery</b> |          |     |               |      |                   |                  |                |                           |                                          |                                                                                                     |                                                                                                                |                                                  |                                                                                       |                             |
| 6                                                               | 67       | M   | Prostate      | 12   | 1                 | T3, T6–7, T12–L1 | Sclerotic      | C7–T9                     | Open                                     | Posterior stabilization C7–T9; decompression T3–T6                                                  | Screw pull-out; increase kyphosis 14° with implant prominence at T9                                            | 36 months; intractable pain                      | Patient declined surgery                                                              | 65                          |
| 7                                                               | 64       | M   | Kidney        | 12   | 1                 | T6               | Lytic          | T4–T8                     | Open                                     | Posterior stabilization T4–T8; near total corpectomy with anterior reconstruction with cage         | Increase in kyphosis 10°; anterior height loss 5 mm; cage subsidence; screw ploughing                          | 3 months; intractable; back pain                 | Not revised as patient terminally ill and not fit for surgery                         | 4                           |
| 8                                                               | 46       | M   | Lung          | 7    | 2                 | T12, L2          | Mixed          | T12–L3                    | Open                                     | Posterior stabilization T12–L3; L2 anterior decompression and reconstruction with cage              | Reduce anterior column height; cage subsidence; reduced lordosis; screw cut-out                                | 3 months; intractable pain                       | Not revised as tumor mass was inoperable                                              | 13                          |

(Continued on next page)

Supplemental Table 2. Continued

| No.                                | Age (yr) | Sex | Primary tumor | SINS | ECOG preoperative | Metastasis site | Type of lesion | Levels of instrumentation | Approach | Type of surgery (posterior, anterior, combined)                                                | Type of failure/description                                                     | Onset and presentation of failure                 | Revision after index surgery                                                                          | Survival after surgery (mo) |
|------------------------------------|----------|-----|---------------|------|-------------------|-----------------|----------------|---------------------------|----------|------------------------------------------------------------------------------------------------|---------------------------------------------------------------------------------|---------------------------------------------------|-------------------------------------------------------------------------------------------------------|-----------------------------|
| 9                                  | 71       | M   | Thyroid       | 10   | 2                 | L4              | Lytic          | L1-S1                     | Open     | Posterior stabilization L1-S1                                                                  | Disease progression in L3 and L4 leading to proximal screw pull-out             | 3.5 months; intractable pain                      | Not revised as patient terminally ill                                                                 | 4.5                         |
| Peri-construct disease progression |          |     |               |      |                   |                 |                |                           |          |                                                                                                |                                                                                 |                                                   |                                                                                                       |                             |
| 10                                 | 59       | F   | Breast        | 14   | 0                 | C5-C7           | Mixed          | C3-T2                     | Open     | Anterior corpectomy C5-C7; anterior cervical plating C4-C7; posterior stabilization from C3-T2 | Peri-construct disease in T3-T4                                                 | 16 months; neurological deficit; intractable pain | Extension of instrumentation in T3-T6; decompression of T3 with cementing of vertebral body           | 40                          |
| 11                                 | 51       | M   | Lung          | 11   | 3                 | T7, T10, L1     | Lytic          | T6-L2                     | MIS      | Posterior stabilization T6-L2                                                                  | Peri-construct disease progression in T4 requiring extension to T1              | 20 months; intractable pain                       | Extension of posterior instrumentation up to T1; decompression laminectomy T4 with partial corpectomy | 24                          |
| 12                                 | 59       | F   | Kidney        | 13   | 0                 | T9-T11, L1-L3   | Lytic          | T9-L3                     | Open     | Posterior stabilization T9-L3; anterior decompression and reconstruction of T12                | Peri-construct disease progression in T5-T9                                     | 4 months; intractable pain                        | Extension of instrumentation till T2; decompression of T5 to T7                                       | 6                           |
| 13                                 | 51       | F   | Lungs         | 13   | 2                 | T11             | Lytic          | T9-L1                     | Open     | Posterior stabilization T9-L1; decompression of T11 & cage insertion                           | Peri-construct disease progression in L3                                        | 60 months; neurological deficit; instability pain | Extension of posterior instrumentation from T9-L5; corpectomy L3 with Harri's cage & cement           | 69                          |
| 14                                 | 57       | F   | Cervix        | 7    | 3                 | L4-L5           | Lytic          | L2-iliac                  | MIS      | Posterior stabilization L2-iliac; decompression of L4-S1                                       | Screw pull-out at the lower end of the construct due to tumor progression in S1 | 12 months; neurological deficit                   | Revision of instrumentation and decompression of L3-S1                                                | 15                          |

SINS, Spinal Instability Neoplastic Score; ECOG, Eastern Cooperation Oncology Group; F, female; M, male; MIS, minimally invasive surgery.
